# Supplementary figures and images for: Physiological Consequences of Targeting 14-3-3 and Its Interacting Partners in Neurodegenerative Diseases
Source: MDPI journal article supplement (doi:10.3390/ijms232415457), 2022-12-07

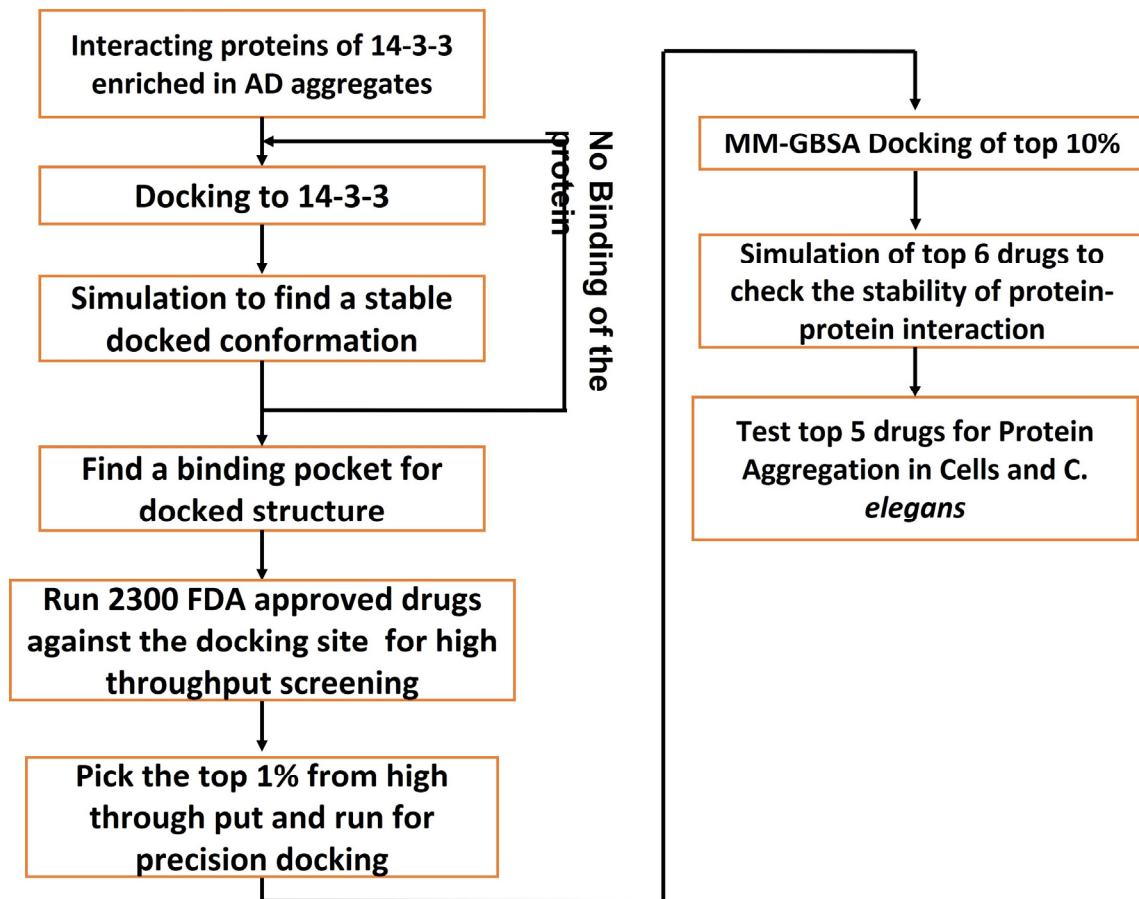

Figure S1. FDA-approved drug screening.

Supplement: s1 [file s1]
